# Supplementary material for: Endothelin type A receptors mediate pain in a mouse model of sickle cell disease
Source: PubMed Central journal article supplement — Haematologica. 2018 Mar 15;103(7):1124–35. doi: 10.3324/haematol.2017.187013 (PMC6029538; doi:10.3324/haematol.2017.187013), 2018-07
Supplement: 2017_187013-Disclosures_and_Contributions.pdf [file 2017_187013-Disclosures_and_Contributions.pdf]

Haematologica  
HAEMATOL/2017/187013  
Version 4

Endothelin-Type A receptors mediate pain in a mouse model of sickle cell disease

Brianna Marie Lutz, Shaogen Wu, Xiyao Gu, Fidelis E Atianjoh, Zhen Li, Brandon M Fox, David M Pollock, and Yuan-Xiang Tao

Disclosures: none

Contributions: Y.X.T. conceived the project and supervised all experiments. B.M.L. designed and performed behavioral, biochemical, molecular, and immunohistochemical studies. X.G. carried out the electrophysiological studies. S.W. assisted with the molecular assays. F.E.A and Z.L. also participated in behavioral studies. B.M.F and D.M.P performed IEF. B.M.L., X.G., F.E.A, and Y.X.T. analyzed the data. B.M.L. and Y.X.T wrote the manuscript.
